# Supplementary material for: Printing on liquid elastomers
Source: Royal Society of Chemistry journal article supplement (doi:10.1039/c9sm02452b), 2020-01-01
Supplement: c9sm02452b3.pdf [file c9sm02452b3.pdf]

Supplementary information for

**Printing on liquid elastomers**

*Lingzhi Cai, Joel Marthelot, Claudio Falcon, Pedro M. Reis and P.-T. Brun*

Movie 1: High speed movie of the droplets deposition (same experimental conditions as in Fig3a). The movie is slowed down by a factor 16.

Movie 2: Bursting of an encapsulated drop under compression (same experimental conditions as in Fig5b).
